# Supplementary material
Source: publisher figshare collection journal article supplement (https://karger.figshare.com/articles/dataset/_/12309806)
Supplement: Supplementary file 1 [file 1]

1 Figure A1: Alcohol-attributable age-adjusted mortality rates per 100,000 since 2000 and 95%  
2 confidence intervals

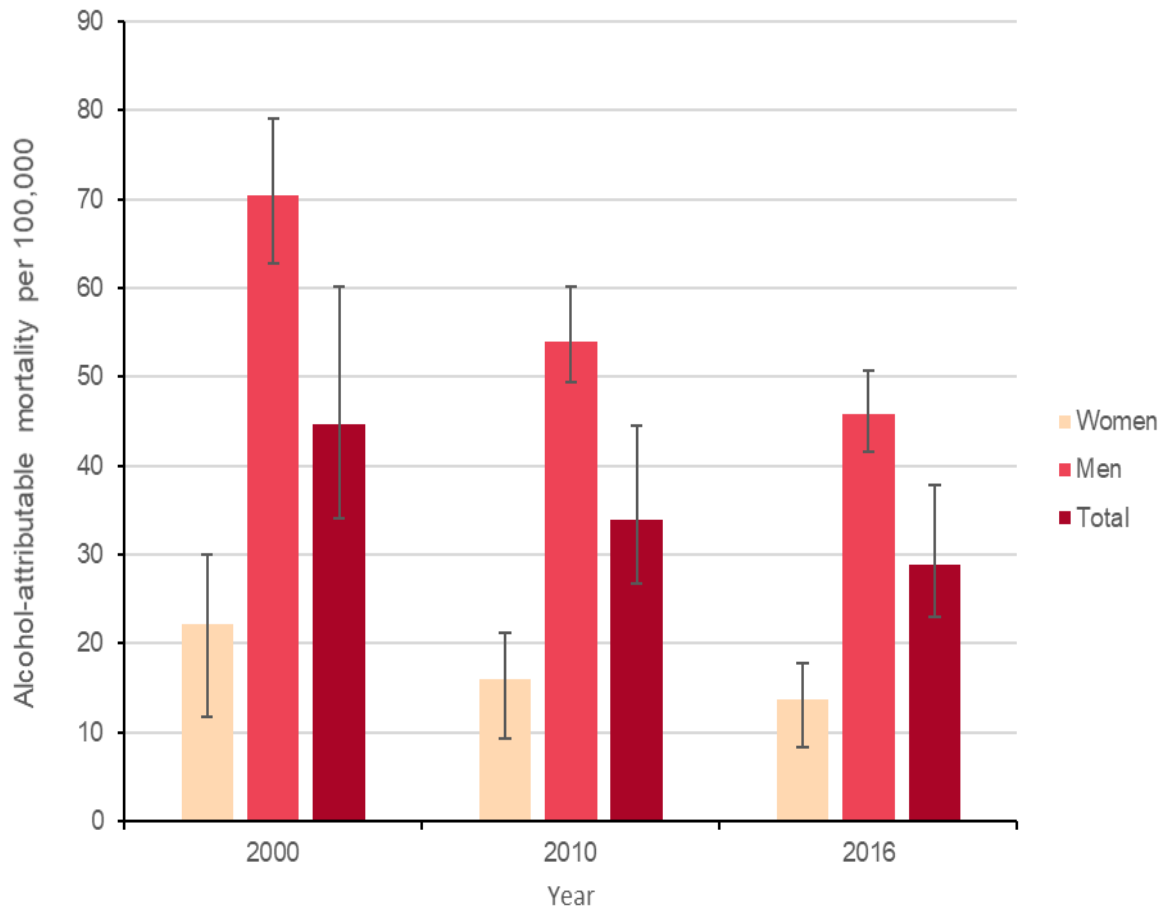

3  
4 Source: Own calculations based on Shield et al. (23)  
5

6 Figure A2: Alcohol-attributable age-adjusted DALY rates per 100,000 since 2000 and 95%  
7 confidence intervals

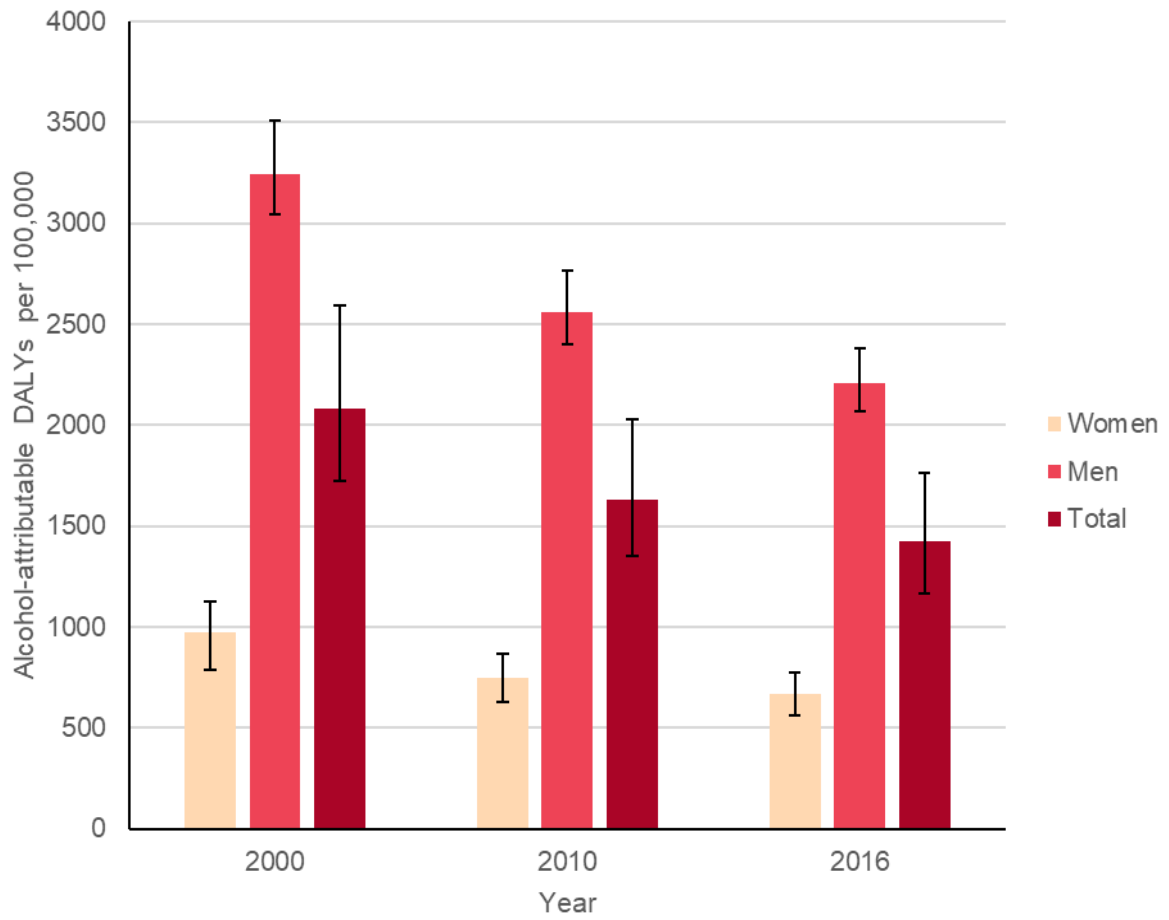

8  
9 Source: Own calculations based on Shield et al. (23)  
10
